# Supplementary material for: Development and validation of a non-invasive method for quantifying amino acids in human saliva
Source: Royal Society of Chemistry journal article supplement (doi:10.1039/d4ra01130a), 2024-01-01
Supplement: d4ra01130a1.pdf [file d4ra01130a1.pdf]

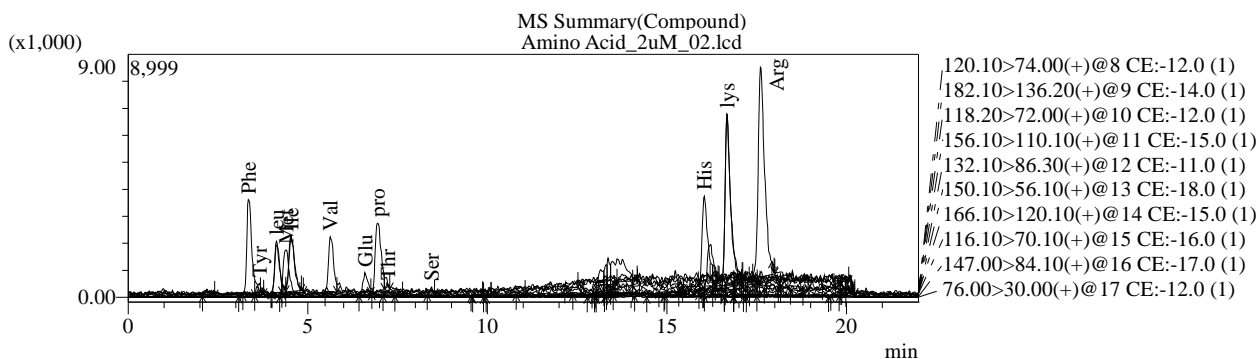

ID#1 Compound Name: Phe m/z: 166.10>120.10

| Title                 | Ret. Time | Area  | Height | Conc. |
|-----------------------|-----------|-------|--------|-------|
| Amino Acid_2uM_02.lcd | 3.354     | 34579 | 3484   | 1.870 |
| Average               | 3.354     | 34579 | 3484   | 1.870 |
| %RSD                  | --        | --    | --     | --    |
| Maximum               | 3.354     | 34579 | 3484   | 1.870 |
| Minimum               | 3.354     | 34579 | 3484   | 1.870 |
| Standard Deviation    | --        | --    | --     | --    |

ID#2 Compound Name: Tyr m/z: 182.10>136.20

| Title                 | Ret. Time | Area | Height | Conc. |
|-----------------------|-----------|------|--------|-------|
| Amino Acid_2uM_02.lcd | 3.657     | 4631 | 468    | 1.752 |
| Average               | 3.657     | 4631 | 468    | 1.752 |
| %RSD                  | --        | --   | --     | --    |
| Maximum               | 3.657     | 4631 | 468    | 1.752 |
| Minimum               | 3.657     | 4631 | 468    | 1.752 |
| Standard Deviation    | --        | --   | --     | --    |

ID#3 Compound Name: leu m/z: 132.10>86.30

| Title                 | Ret. Time | Area  | Height | Conc. |
|-----------------------|-----------|-------|--------|-------|
| Amino Acid_2uM_02.lcd | 4.132     | 16533 | 1874   | 1.602 |
| Average               | 4.132     | 16533 | 1874   | 1.602 |
| %RSD                  | --        | --    | --     | --    |
| Maximum               | 4.132     | 16533 | 1874   | 1.602 |
| Minimum               | 4.132     | 16533 | 1874   | 1.602 |
| Standard Deviation    | --        | --    | --     | --    |

ID#4 Compound Name: Met m/z: 150.10>56.10

| Title                 | Ret. Time | Area  | Height | Conc. |
|-----------------------|-----------|-------|--------|-------|
| Amino Acid_2uM_02.lcd | 4.397     | 20424 | 1717   | 1.619 |
| Average               | 4.397     | 20424 | 1717   | 1.619 |
| %RSD                  | --        | --    | --     | --    |
| Maximum               | 4.397     | 20424 | 1717   | 1.619 |
| Minimum               | 4.397     | 20424 | 1717   | 1.619 |
| Standard Deviation    | --        | --    | --     | --    |

ID#5 Compound Name: Ile m/z: 132.10>86.30

| Title                 | Ret. Time | Area  | Height | Conc. |
|-----------------------|-----------|-------|--------|-------|
| Amino Acid_2uM_02.lcd | 4.542     | 21966 | 1984   | 1.841 |
| Average               | 4.542     | 21966 | 1984   | 1.841 |
| %RSD                  | --        | --    | --     | --    |
| Maximum               | 4.542     | 21966 | 1984   | 1.841 |
| Minimum               | 4.542     | 21966 | 1984   | 1.841 |
| Standard Deviation    | --        | --    | --     | --    |

ID#6 Compound Name: Val m/z: 118.20>72.00

| Title                 | Ret. Time | Area  | Height | Conc. |
|-----------------------|-----------|-------|--------|-------|
| Amino Acid_2uM_02.lcd | 5.628     | 23813 | 2095   | 2.047 |
| Average               | 5.628     | 23813 | 2095   | 2.047 |
| %RSD                  | --        | --    | --     | --    |
| Maximum               | 5.628     | 23813 | 2095   | 2.047 |
| Minimum               | 5.628     | 23813 | 2095   | 2.047 |
| Standard Deviation    | --        | --    | --     | --    |

ID#7 Compound Name: Glu m/z: 148.10>84.10

| Title                 | Ret. Time | Area | Height | Conc. |
|-----------------------|-----------|------|--------|-------|
| Amino Acid_2uM_02.lcd | 6.594     | 8260 | 820    | 1.746 |
| Average               | 6.594     | 8260 | 820    | 1.746 |
| %RSD                  | --        | --   | --     | --    |
| Maximum               | 6.594     | 8260 | 820    | 1.746 |
| Minimum               | 6.594     | 8260 | 820    | 1.746 |
| Standard Deviation    | --        | --   | --     | --    |

ID#8 Compound Name: pro m/z: 116.10>70.10

| Title                 | Ret. Time | Area  | Height | Conc. |
|-----------------------|-----------|-------|--------|-------|
| Amino Acid_2uM_02.lcd | 6.944     | 29836 | 2531   | 1.938 |
| Average               | 6.944     | 29836 | 2531   | 1.938 |
| %RSD                  | --        | --    | --     | --    |
| Maximum               | 6.944     | 29836 | 2531   | 1.938 |
| Minimum               | 6.944     | 29836 | 2531   | 1.938 |

| Title              | Ret. Time | Area | Height | Conc. |
|--------------------|-----------|------|--------|-------|
| Standard Deviation | --        | --   | --     | --    |

ID#9 Compound Name: Thr m/z: 120.10>74.00

| Title                 | Ret. Time | Area | Height | Conc. |
|-----------------------|-----------|------|--------|-------|
| Amino Acid_2uM_02.lcd | 7.233     | 4509 | 364    | 1.999 |
| Average               | 7.233     | 4509 | 364    | 1.999 |
| %RSD                  | --        | --   | --     | --    |
| Maximum               | 7.233     | 4509 | 364    | 1.999 |
| Minimum               | 7.233     | 4509 | 364    | 1.999 |
| Standard Deviation    | --        | --   | --     | --    |

ID#10 Compound Name: Ser m/z: 106.10>60.20

| Title                 | Ret. Time | Area | Height | Conc. |
|-----------------------|-----------|------|--------|-------|
| Amino Acid_2uM_02.lcd | 8.445     | 929  | 228    | 1.882 |
| Average               | 8.445     | 929  | 228    | 1.882 |
| %RSD                  | --        | --   | --     | --    |
| Maximum               | 8.445     | 929  | 228    | 1.882 |
| Minimum               | 8.445     | 929  | 228    | 1.882 |
| Standard Deviation    | --        | --   | --     | --    |

ID#11 Compound Name: His m/z: 156.10>110.10

| Title                 | Ret. Time | Area  | Height | Conc. |
|-----------------------|-----------|-------|--------|-------|
| Amino Acid_2uM_02.lcd | 16.037    | 22984 | 2704   | 1.986 |
| Average               | 16.037    | 22984 | 2704   | 1.986 |
| %RSD                  | --        | --    | --     | --    |
| Maximum               | 16.037    | 22984 | 2704   | 1.986 |
| Minimum               | 16.037    | 22984 | 2704   | 1.986 |
| Standard Deviation    | --        | --    | --     | --    |

ID#12 Compound Name: lys m/z: 147.00>84.10

| Title                 | Ret. Time | Area  | Height | Conc. |
|-----------------------|-----------|-------|--------|-------|
| Amino Acid_2uM_02.lcd | 16.670    | 58385 | 6087   | 1.958 |
| Average               | 16.670    | 58385 | 6087   | 1.958 |
| %RSD                  | --        | --    | --     | --    |
| Maximum               | 16.670    | 58385 | 6087   | 1.958 |
| Minimum               | 16.670    | 58385 | 6087   | 1.958 |
| Standard Deviation    | --        | --    | --     | --    |

ID#13 Compound Name: Arg m/z: 175.10>70.10

| Title                 | Ret. Time | Area  | Height | Conc. |
|-----------------------|-----------|-------|--------|-------|
| Amino Acid_2uM_02.lcd | 17.609    | 89840 | 7586   | 2.208 |
| Average               | 17.609    | 89840 | 7586   | 2.208 |
| %RSD                  | --        | --    | --     | --    |
| Maximum               | 17.609    | 89840 | 7586   | 2.208 |
| Minimum               | 17.609    | 89840 | 7586   | 2.208 |
